# Supplementary material for: Highly activated K-doped iron carbide nanocatalysts designed by computational simulation for Fischer–Tropsch synthesis
Source: Royal Society of Chemistry journal article supplement (doi:10.1039/c4ta02413c), 2014-01-01
Supplement: c4ta02413c1.pdf [file c4ta02413c1.pdf]

## Supplementary Information

### Highly Activated K-Doped Iron Carbide Nanocatalysts Designed by Computational Simulation for Fischer-Tropsch Synthesis

5

Ji Chan Park, Sang Chul Yeo, Dong Hyun Chun, Jung Tae Lim, Jung-II Yang, Ho-Tae Lee,  
Sungjun Hong, Hyuck Mo Lee, Chul Sung Kim, and Heon Jung\*

10

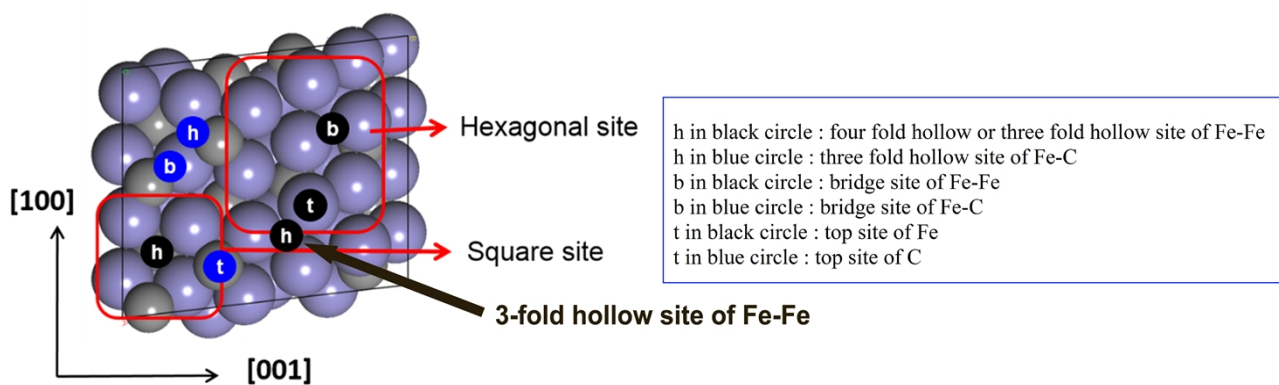

15

20 **Fig. S1** K-free Hägg-carbide ( $\chi$ -Fe<sub>5</sub>C<sub>2</sub>) model of a 1x2 super-cell in top view.

25

30

5

10

15

20

25

30

35

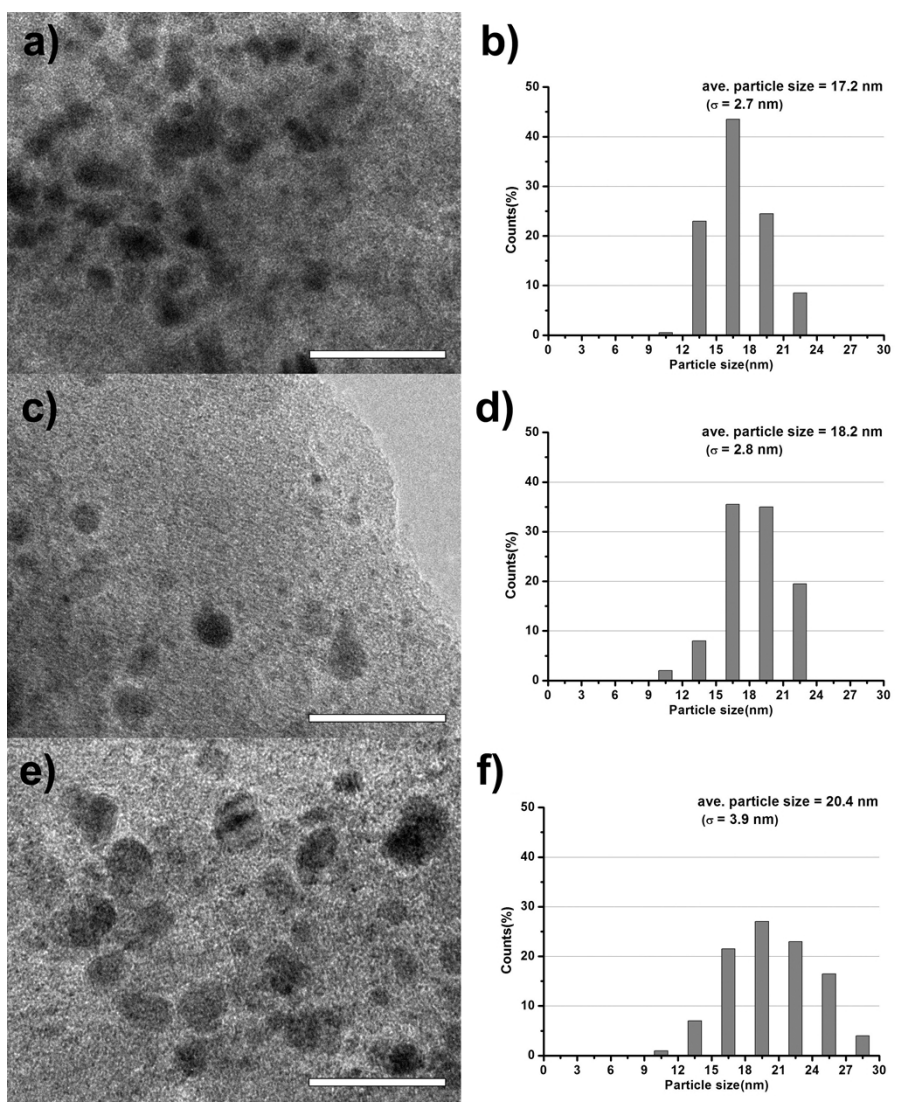

**Fig. S2** TEM images and particle size distribution histograms of K-doped  $\chi$ -Fe<sub>5</sub>C<sub>2</sub> nanoparticles on activated charcoal: (a-b) K/Fe = 0.025, (c-d) K/Fe = 0.050, (e-f) K/Fe = 0.100. More than 200 particles were counted for each sample. All bars represent 50 nm.

40

45

5

10

15

20

25

30

35

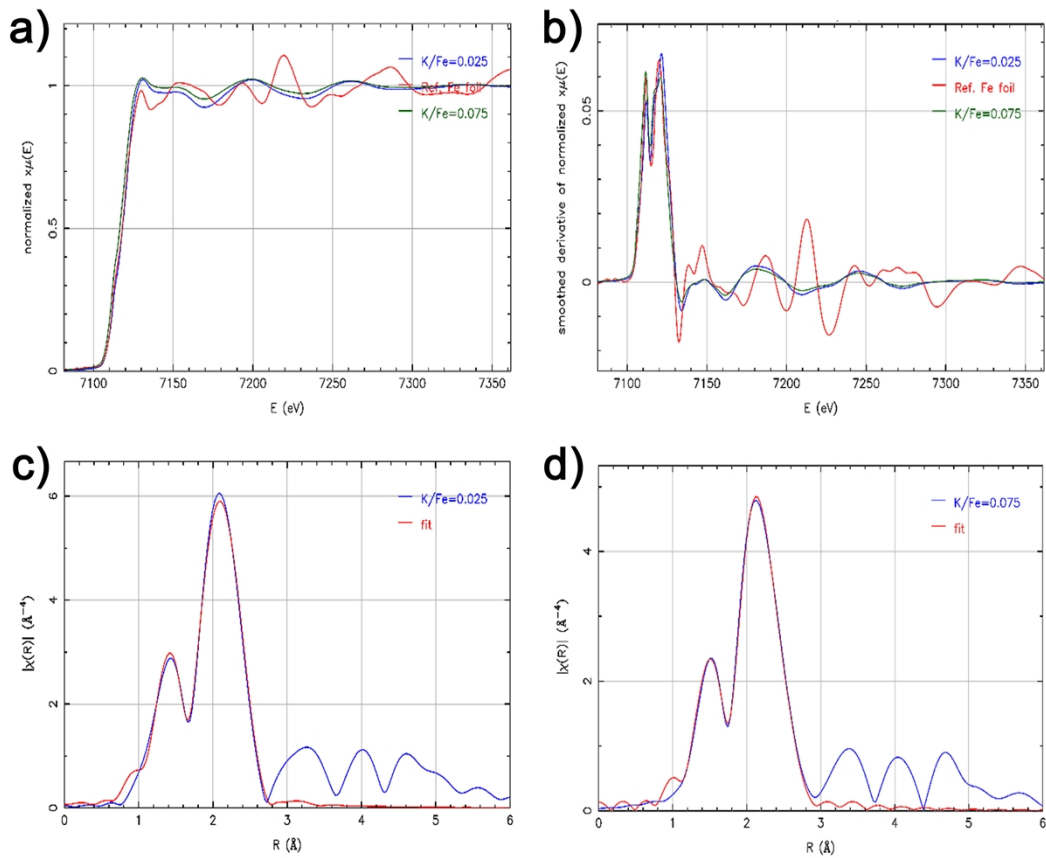

40 **Fig. S3** (a) Normalized Fe K-edge X-ray absorption spectra, (b) derivative of normalized absorption coefficient, and (c-d) Fe K-edge EXAFS spectra for K-doped  $\chi$ -Fe<sub>5</sub>C<sub>2</sub> on activated charcoal at K/Fe = 0.025 and K/Fe = 0.075.

45

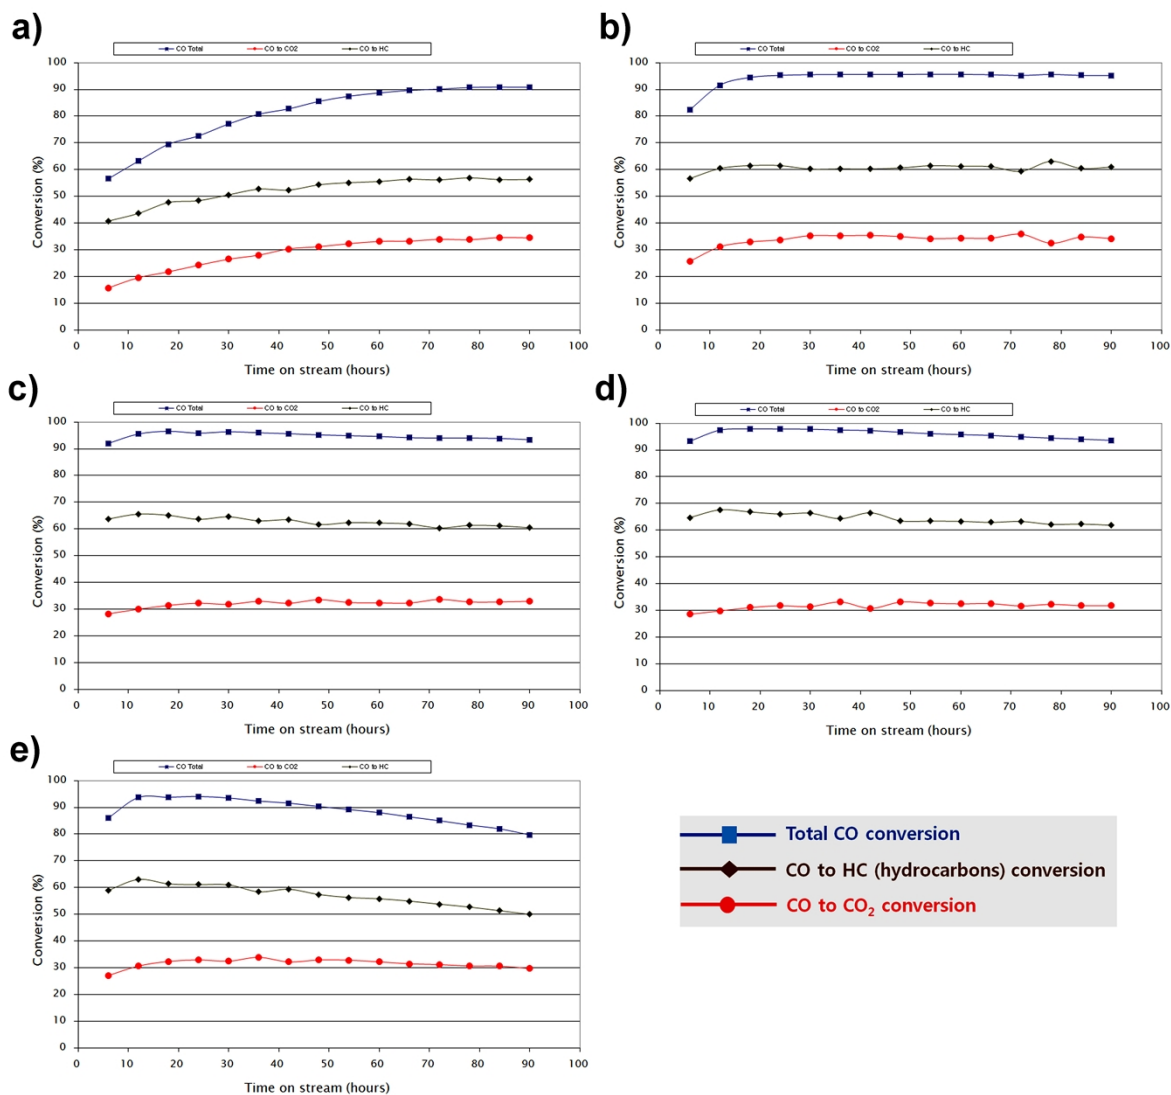

5 Fig. S4 CO conversion data for K-free and K-doped  $\chi$ -Fe<sub>5</sub>C<sub>2</sub>/charcoal catalysts. (a) K-free Fe<sub>5</sub>C<sub>2</sub>, (b) K/Fe = 0.025, (c) K/Fe = 0.050, (d) K/Fe = 0.075, (e) K/Fe = 0.100.

10

15

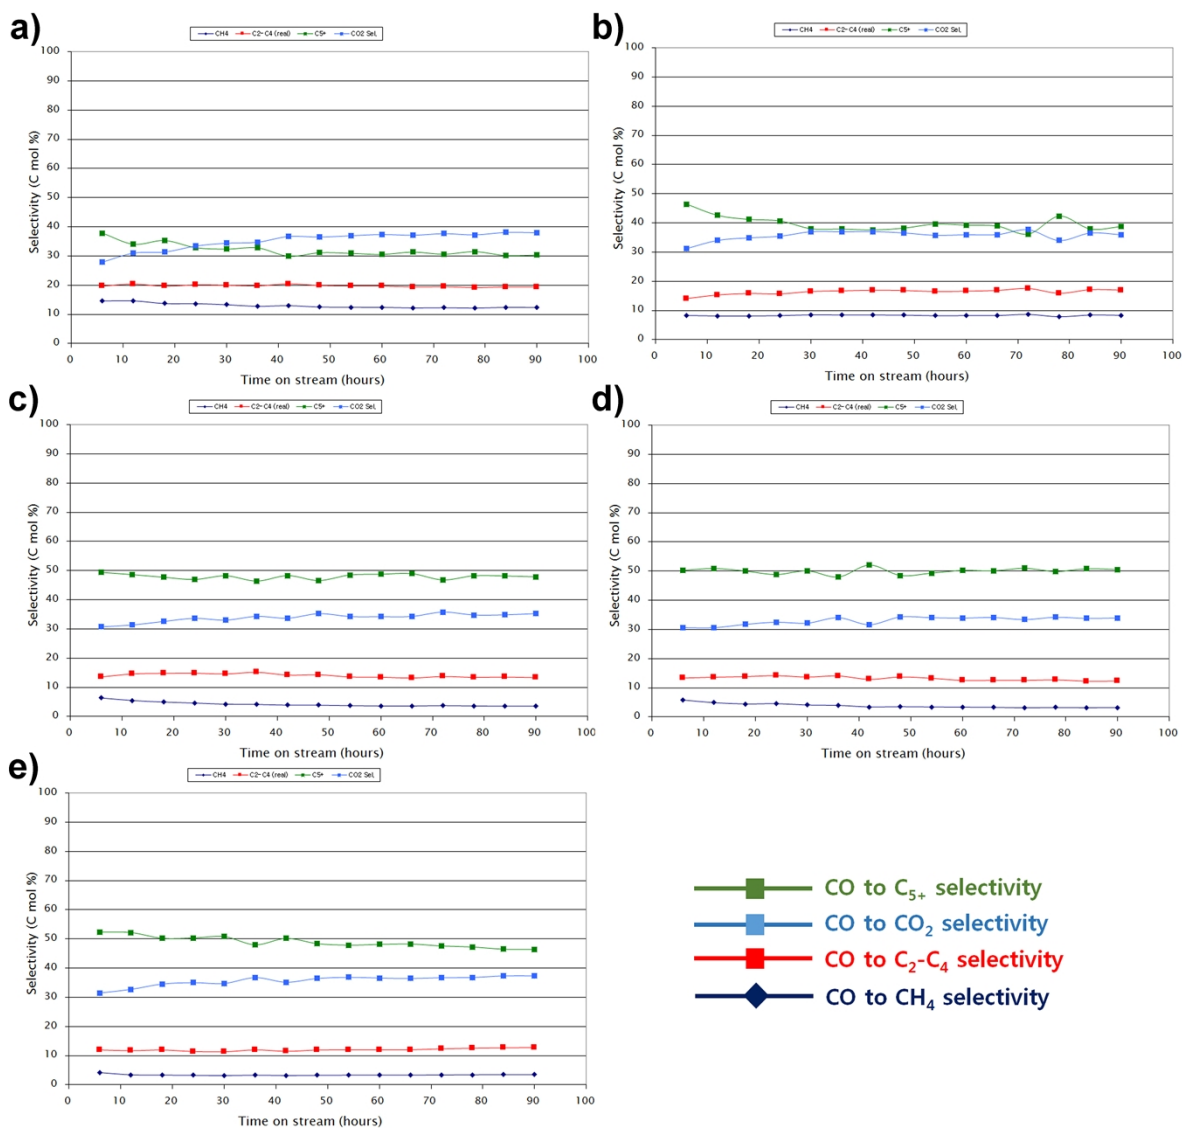

**Fig. S5** CO<sub>2</sub> and hydrocarbon product selectivity data for K-free and K-doped  $\chi$ -Fe<sub>5</sub>C<sub>2</sub>/charcoal catalysts. (a) K-free Fe<sub>5</sub>C<sub>2</sub>, (b) K/Fe = 0.025, (c) K/Fe = 0.050, (d) K/Fe = 0.075, (e) K/Fe = 0.100.

5

10

15

**Table S1** Calculated adsorption energies ( $E_{\text{ad}}$ ) and Bader charges ( $q$ ) for the potassium atom located on the various adsorption sites of Hägg-carbide model.

| Site          |               | $E_{\text{ad}}$ [eV] | $q_{\text{K}}(\Delta e)$ |
|---------------|---------------|----------------------|--------------------------|
| Fe-terminated | 4-fold hollow | -2.45                | 0.82                     |
|               | 3-fold hollow | -2.48                | 0.86                     |
|               | Fe-Fe bridge  | -2.45                | 0.82                     |
|               | Fe top        | -2.21                | 0.78                     |
| C-terminated  | 3-fold hollow | -2.37                | 0.80                     |
|               | Fe-C bridge   | -2.45                | 0.82                     |
|               | C top         | -2.46                | 0.81                     |

5

10

15

20

25

**Table S2** Mössbauer parameters of K-free  $\chi$ -Fe<sub>5</sub>C<sub>2</sub>/charcoal catalyst.

| Temperature (K) | site                                   |         |          |                                |        |
|-----------------|----------------------------------------|---------|----------|--------------------------------|--------|
|                 | $\chi$ -Fe <sub>5</sub> C <sub>2</sub> |         |          | Fe <sub>2</sub> O <sub>3</sub> |        |
|                 | I (8f)                                 | II (8f) | III (4e) |                                |        |
| 4.2             | $H_{hf}$ (kO <sub>e</sub> )            | 255.45  | 216.03   | 126.63                         | 530.35 |
|                 | $\delta$ (mm/s)                        | 0.26    | 0.16     | 0.21                           | 0.41   |
|                 | $E_Q$ (mm/s)                           | 0.02    | 0.02     | 0.01                           | 0.11   |
|                 | Area (%)                               | 35.38   | 34.32    | 17.92                          | 12.38  |
| 295             | $H_{hf}$ (kO <sub>e</sub> )            | 218.39  | 183.23   | 109.59                         | -      |
|                 | $\delta$ (mm/s)                        | 0.14    | 0.04     | 0.06                           | 0.19   |
|                 | $E_Q$ (mm/s)                           | 0.02    | 0.01     | 0.04                           | 0.79   |
|                 | Area (%)                               | 33.17   | 36.65    | 17.74                          | 12.44  |

$H_{hf}$ : hyperfine magnetic field;  $\delta$ : isomer shift (all the isomer shifts are referred to  $\alpha$ -Fe at 295K);  $E_Q$ : 5 quadrupole shift.

10

15

20

25

**Table S3.** Hydrocarbon product distributions (wt%) for each sample.

| Catalyst<br>Product                               | K-free | K/Fe<br>= 0.025 | K/Fe<br>= 0.050 | K/Fe<br>= 0.075 | K/Fe<br>= 0.100 |
|---------------------------------------------------|--------|-----------------|-----------------|-----------------|-----------------|
| CH <sub>4</sub>                                   | 38.5   | 23.8            | 11.5            | 10.6            | 9.1             |
| lower (C <sub>2</sub> -C <sub>4</sub> ) olefins   | 10.2   | 15.7            | 24.7            | 23.8            | 23.1            |
| lower (C <sub>2</sub> -C <sub>4</sub> ) paraffins | 43.8   | 26.7            | 8.9             | 7.8             | 5.0             |
| C <sub>5</sub> -C <sub>12</sub> (gasoline)        | 5.3    | 27.8            | 34.5            | 34.4            | 33.9            |
| C <sub>13</sub> -C <sub>18</sub> (diesel)         | 1.4    | 4.1             | 10.4            | 11.6            | 13.0            |
| C <sub>19+</sub> (wax)                            | 0.8    | 2.0             | 10.0            | 11.8            | 15.9            |

5

10

15

20

25
